# Supplementary material for: Negative regulation of cationic nanoparticle-induced inflammatory toxicity through the increased production of prostaglandin E2 via mitochondrial DNA-activated Ly6C+ monocytes: Erratum
Source: PubMed Central journal article supplement (PMC6735400; doi:10.7150/thno.37524), 2019-07-17
Supplement: thnov09p5443s1.pdf [file thnov09p5443s1.pdf]

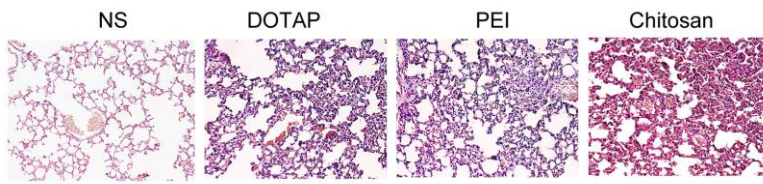

**Supplementary Figure 10.** Representative H&E stained section of lung from the mice treated with DOTAP liposomes (25 mg/kg), PEI (5 mg/kg) and chitosan (25 mg/kg) after 24 h (n=5), scale bars=50 $\mu$ m. Data are representative of three independent experiments.

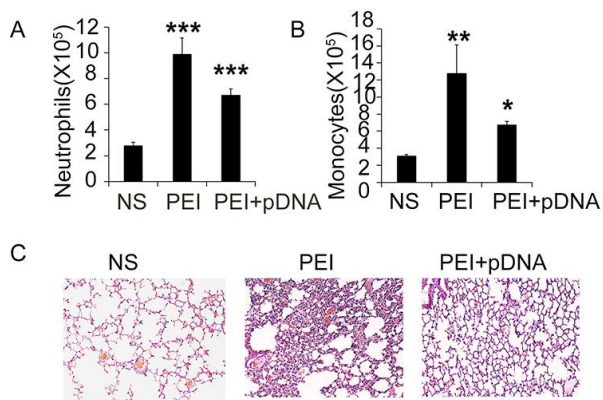

**Supplementary Figure 16.** C57BL/6 mice were treated with intravenous injection of PEI nanoparticles (5 mg/kg), PEI/pVAX plasmid lipoplexes (w/w 5/5) or normal saline as control. Flow cytometry analysis of recruited cells in lung after administration for 24 h. Numbers indicate either CD45<sup>+</sup>CD11b<sup>+</sup>Ly6C<sup>+</sup> monocytes or CD45<sup>+</sup>CD11b<sup>+</sup>Ly6G<sup>+</sup> neutrophils in the quadrant expressed as number of the cells in the lung after perfusion. (n=5). And Representative H&E stained section of lung from the mice treated with PEI nanoparticles (5 mg/kg), PEI/pVAX plasmid lipoplexes (w/w 5/5) or normal saline as control. Data are representative of three independent experiments, and the results are expressed as the means  $\pm$  S.E.M. Statistical comparisons were performed using Student's t-test or Dunnet's t-test (\* $P$ <0.05; \*\* $P$ <0.01; \*\*\* $P$ <0.005).
